# Supplementary material for: Chiral Separation, Configuration Confirmation and Bioactivity Determination of the Stereoisomers of Hesperidin and Narirutin in Citrus reticulata Blanco
Source: MDPI journal article supplement (doi:10.3390/molecules28020873), 2023-01-15
Supplement: s1 [file s1]

## Supplementary Materials

**Figure S1-1**

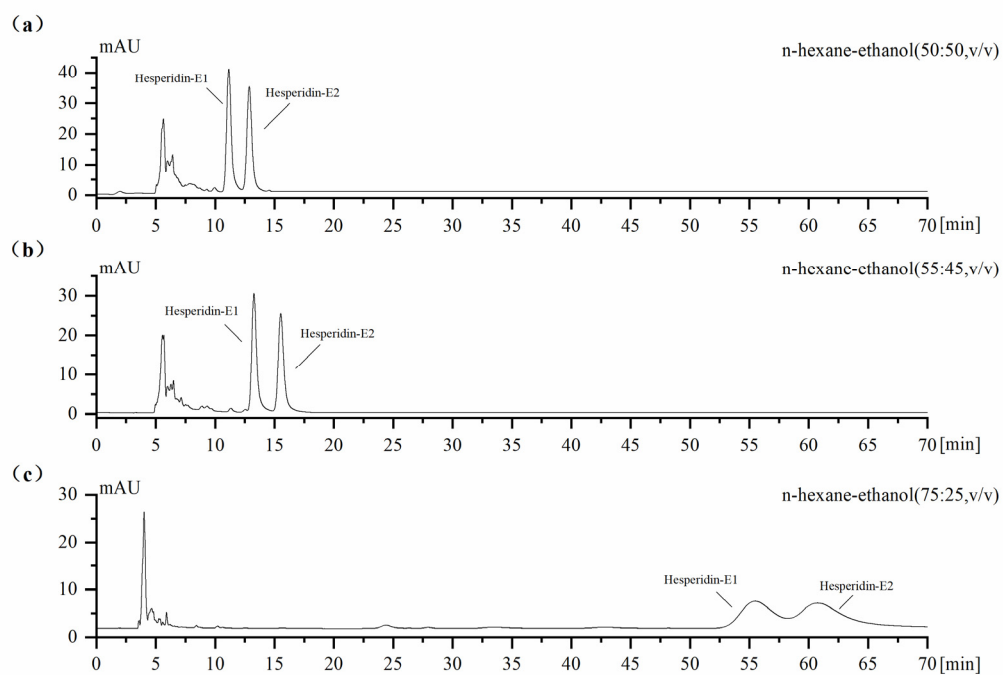

**Figure S1-1** Chromatograms of Hesperidin with various mobile phases on Chiral INC column.

**Figure S1-2**

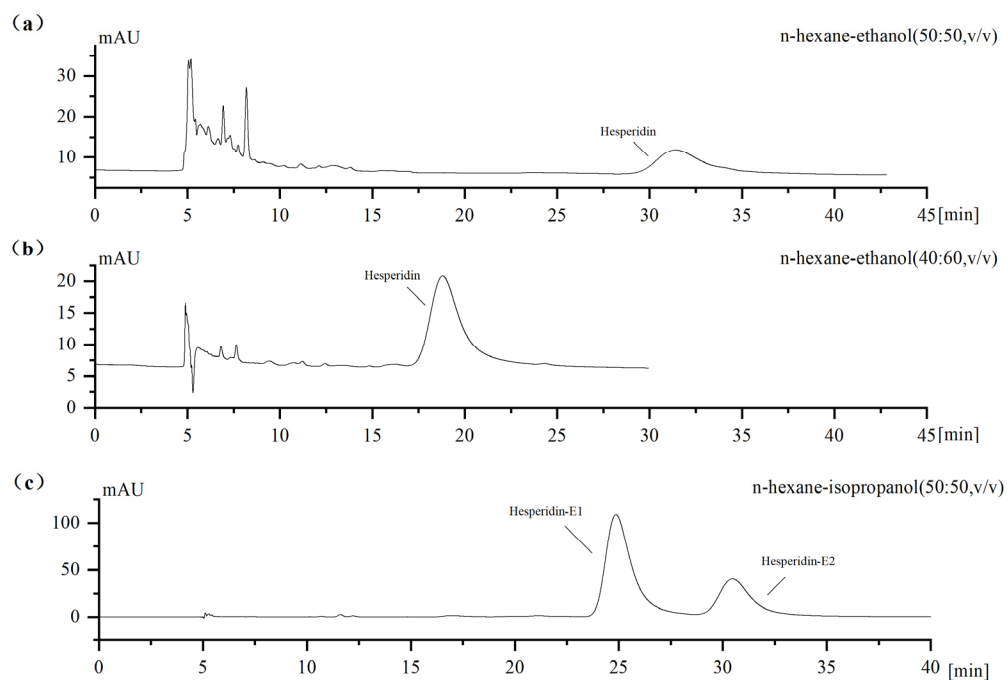

**Figure S1-2** Chromatograms of Hesperidin with various mobile phases on Chiral ND column.

**Figure S1-3**

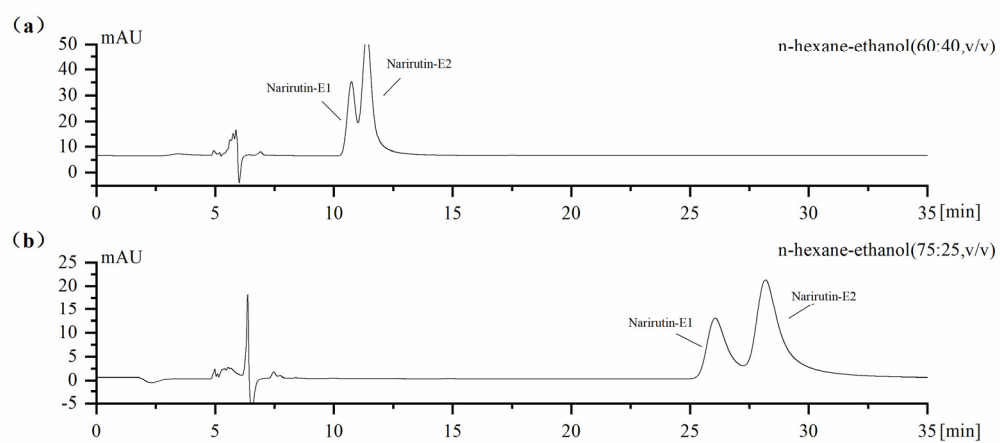

**Figure S1-3** Chromatograms of Narirutin with various mobile phases on Chiral INC column.

**Figure S1-4**

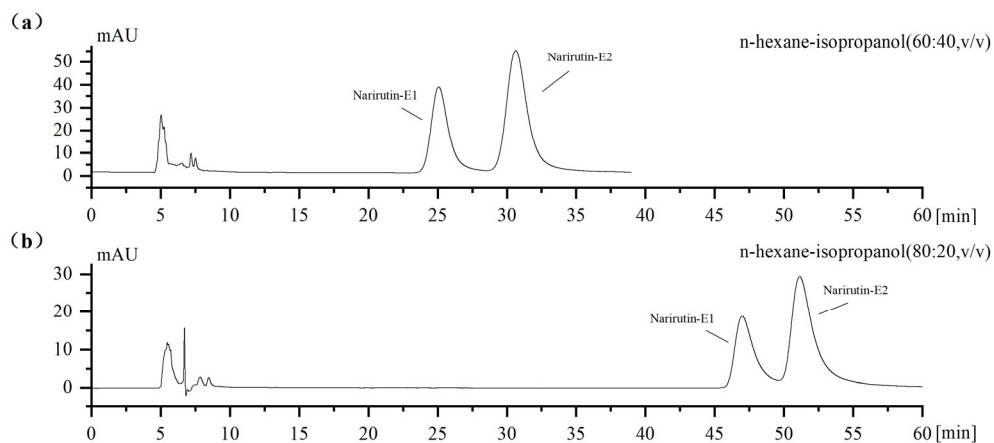

**Figure S1-4** Chromatograms of Narirutin with various mobile phases on Chiral ND column.

**Figure S1-5**

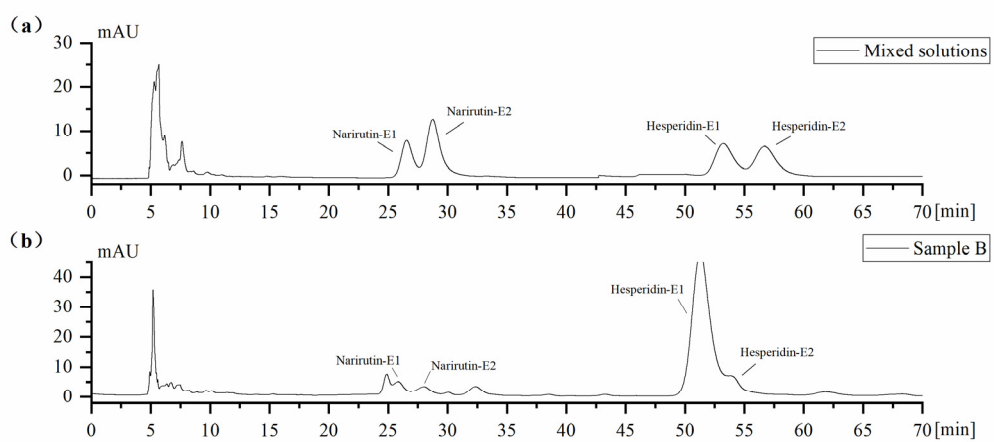

**Figure S1-5** Separation chromatograms of the mixed solutions and sample B on Chiral INC column. Mobile phase composition: n-hexane-ethanol (75:25, v/v); column temperature: 25°C; flow rate: 0.6 mL/min.

**Figure S1-6**

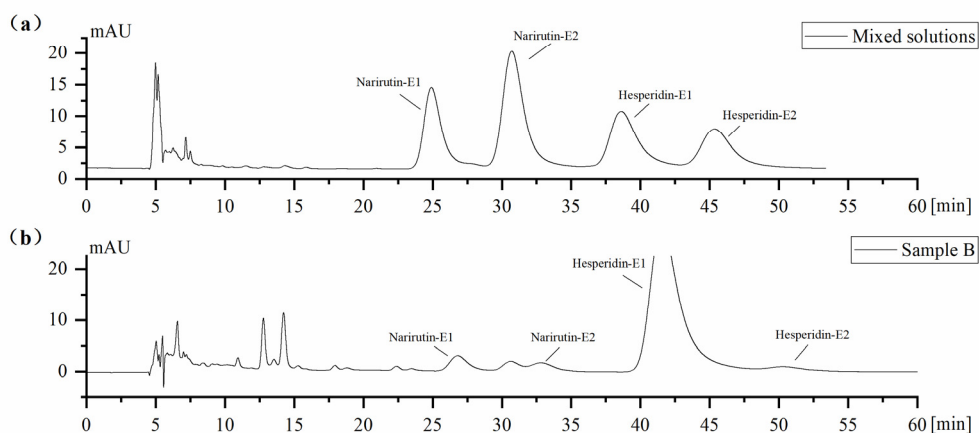

**Figure S1-6** Separation chromatograms of the mixed solutions and sample B on Chiral ND column. Mobile phase composition: n-hexane- isopropanol (60:40, v/v); column temperature: 25°C; flow rate: 0.6 mL/min.

**Figure S1-7**

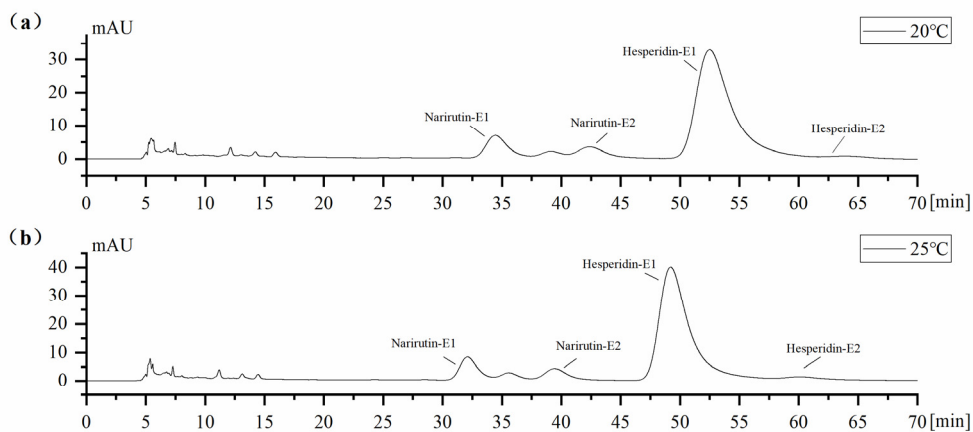

**Figure S1-7** Separation chromatograms of sample B on Chiral ND column. Mobile phase composition: n-hexane- isopropanol (62:38, v/v); flow rate: 0.6 mL/min.

**Figure S2**

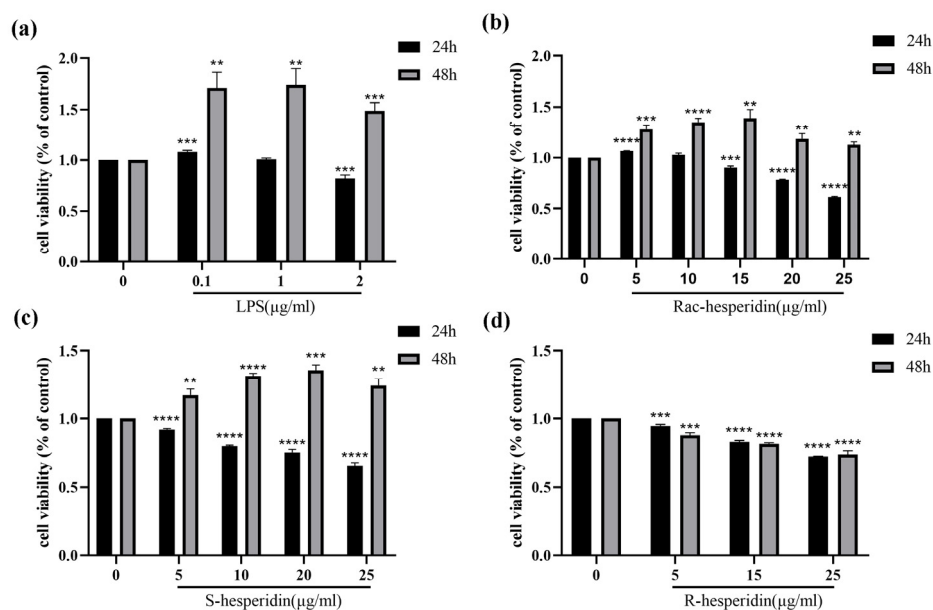

**Figure S2** Effect on cell viability in LPS-stimulated RAW 264.7 macrophages. (a) Effect of LPS on the cell viability of RAW 264.7 macrophages. (b-d) Effect of hesperidin racemates and 2*S*- and 2*R*-isomers on cell viability of RAW 264.7 macrophages.

**Figure S3**

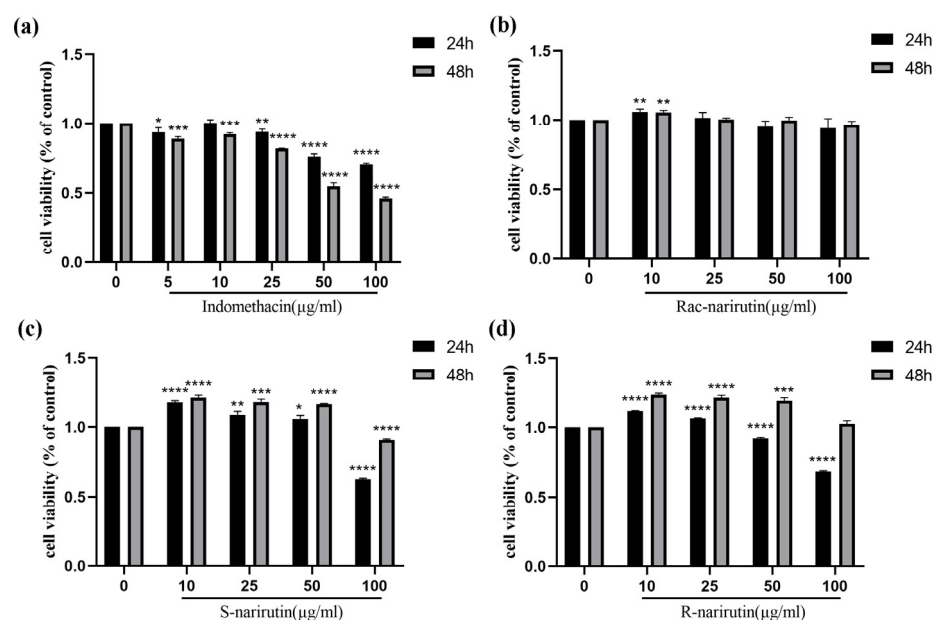

**Figure S3** Effect on cell viability in LPS-stimulated RAW 264.7 macrophages. (a) Effect of Indomethacin on the cell viability of RAW 264.7 macrophages. (b-d) Effect of narirutin racemates and 2*S*- and 2*R*-isomers on cell viability of RAW 264.7 macrophages.

**Figure S4**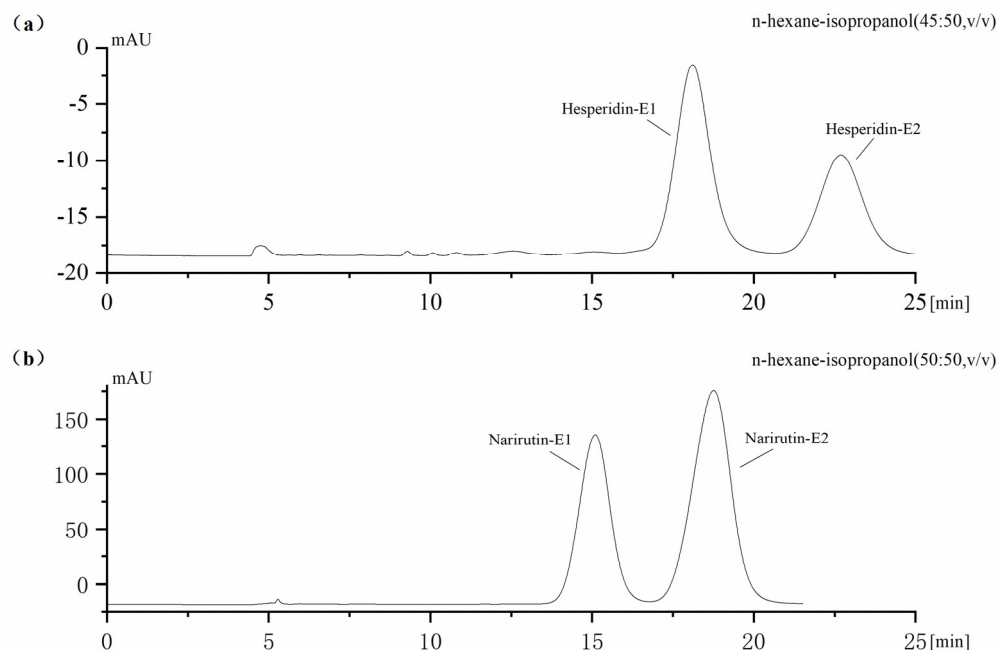**Figure S4** Semi-preparative chromatograms of hesperidin (a) and naringin (b) isomers.**Table S1**

The effects of the types of chiral columns, the kinds, and proportions of mobile phase on the separation of hesperidin and narirutin epimers.

| Analyte    | Column     | Modifier    | Proportion (%) | $k_1$ | $\alpha$ | $R_s$ |
|------------|------------|-------------|----------------|-------|----------|-------|
| Hesperidin | Chiral INC | ethanol     | 50             | 1.2   | 1.28     | 2.33  |
|            |            |             | 45             | 1.7   | 1.27     | 2.89  |
|            |            |             | 25             | 12    | 1.10     | 0.94  |
|            | Chiral ND  | isopropanol | 30             | 6.1   | 1.10     | 1.12  |
|            |            | ethanol     | 60             | 2.8   | /        | /     |
|            |            |             | 50             | 5.2   | /        | /     |
|            |            |             | 50             | 4.1   | 1.28     | 2.22  |
|            |            | isopropanol | 40             | 6.7   | 1.20     | 1.85  |
|            |            |             | 38             | 8.8   | 1.24     | 2.17  |
| Narirutin  | Chiral INC | ethanol     | 40             | 1.2   | 1.11     | 0.89  |
|            |            |             | 25             | 4.2   | 1.10     | 1.31  |
|            | Chiral ND  | isopropanol | 40             | 4.0   | 1.27     | 2.29  |
|            |            |             | 38             | 5.3   | 1.26     | 2.33  |
|            |            |             | 20             | 7.6   | 1.10     | 1.59  |

$k_1$ : the retention factor of the first eluted enantiomer.

$\alpha$ : the separation factor.

$R_s$ : the resolution.

**Table S2**

Isolated amounts and recovery rate of the each epimer

| Analytes               | The starting material(mg) | Component ratio | Recycling amounts(mg) | Recovery rate |
|------------------------|---------------------------|-----------------|-----------------------|---------------|
| 2 <i>S</i> -hesperidin | 68.4                      | 0.6101          | 16                    | 0.3834        |
| 2 <i>R</i> -hesperidin |                           | 0.3899          | 2                     | 0.075         |
| 2 <i>S</i> -narirutin  | 10.0                      | 0.3912          | 2.866                 | 0.7356        |
| 2 <i>R</i> -narirutin  |                           | 0.6088          | 3.556                 | 0.5864        |

**Table S3**The relative energies and population of Narirutin-2*R* conformers

| Conformers of Narirutin-2 <i>R</i> | Relative Energy (kcal/mol) | Population (%) |
|------------------------------------|----------------------------|----------------|
| 1                                  | 0.0000                     | 40.8718        |
| 2                                  | 0.1983                     | 29.2474        |
| 3                                  | 0.5801                     | 15.3525        |
| 4                                  | 0.7108                     | 12.3135        |
| 5                                  | 2.2806                     | 0.8704         |
| 6                                  | 2.3461                     | 0.7794         |
| 7                                  | 2.8787                     | 0.3172         |
| 8                                  | 3.0251                     | 0.2477         |
| 9                                  | 10.6768                    | 0.0000         |
| 10                                 | 10.7535                    | 0.0000         |
| 11                                 | 11.3902                    | 0.0000         |
| 12                                 | 11.5354                    | 0.0000         |

**Table S4**The relative energies and population of Hesperidin-1*R* conformers

| Conformers of Hesperidin-1 <i>R</i> | Relative Energy (kcal/mol) | Population (%) |
|-------------------------------------|----------------------------|----------------|
| 1                                   | 0.0000                     | 48.3986        |
| 2                                   | 0.5544                     | 18.9884        |
| 3                                   | 0.5997                     | 17.5898        |
| 4                                   | 0.9847                     | 9.1839         |
| 5                                   | 1.4152                     | 4.4409         |
| 6                                   | 2.5023                     | 0.7089         |
| 7                                   | 2.6975                     | 0.5099         |
| 8                                   | 3.3160                     | 0.1795         |
| 9                                   | 8.1489                     | 0.0001         |
| 10                                  | 8.3864                     | 0.0000         |
| 11                                  | 8.9731                     | 0.0000         |
| 12                                  | 10.7851                    | 0.0000         |
